# Supplementary material for: Health risk assessment of polychlorinated biphenyls in a fish species (Clarias gariepinus) from southwestern rivers, Nigeria
Source: Royal Society of Chemistry journal article supplement (doi:10.1039/d4va00399c), 2025-01-01
Supplement: d4va00399c1.pdf [file d4va00399c1.pdf]

## SUPPLEMENTARY INFORMATION

### Text SI

#### Non-carcinogenic risk

Following USEPA<sup>1</sup> and recent reports<sup>2,3</sup>, the non-carcinogenic health risk associated with fish consumption was assessed using the target hazard quotient (THQ) defined as follows;

$$THQ = \frac{D_{ig}}{R_{fd}}$$

$$HI = \sum HQ$$

where  $D_{ig}$  = daily intake through ingestion, mg/kg.day and  $R_{fd}$  = reference dose of PCBs (mg/kg day), HI = hazard index, and HQ = hazard Quotient for PAH. Accordingly, if the  $THQ > 1$ , there is the possibility of non-carcinogenic effects on human health. Conversely, if  $THQ \leq 1$ , then exposure to PCBs through consumption of fish indicates no significant effect on consumers.<sup>4,5</sup>

#### Carcinogenic risk assessment

Following previous studies<sup>6-9</sup>, the carcinogenic risk of PCBs was evaluated using toxic equivalency factors (TEFs) as follows;

$TEQ = \sum [\text{Concentration of each dioxin-like congener} \times 2,3,7,8\text{-TCDD TEF}_i]$ .

Where TEQ is the toxic equivalent quantity (TEQ) and  $TEF_i$  is the corresponding toxic equivalency factor.

## Exposure assessment

In this study, one important pathway was considered as major exposure routes for PCBs entry into the body from fish; i.e. direct ingestion. In this report, the exposure dosage via ingestion pathway was adapted from previous reports as follows <sup>4,5</sup>;

$$D_{ig} = C_{fish} \times IR \times EF \times ED / (BW \times AT).$$

Where  $D_{ig}$  is the PCB daily intake through ingestion in mg/(kg day);  $C_{fish}$  is the concentration of PCB in fish (mg/kg), IR is the ingestion rate (0.0548 kg/capital/day), EF is the exposure frequency, ED is the exposure duration (year), BW is the body weight (kg), and AT is the averaging time (day). Details of other components and their corresponding values as obtained from literature and used in the study are presented in Table S2.

## Toxicity assessment

The carcinogenic status of PCBs via fish consumption was evaluated. Following the Integrated Risk Information System (IRIS) of the USEPA, the ingestion slope factor ( $SF_{ig}$ ) of PCB is 2.0 per mg/kg/day.<sup>4,11</sup> Thus, the cancer risk (CR) of the dietary exposure (dimensionless) associated with ingestion ( $CR_{ig}$ ) exposure was estimated following USEPA<sup>4</sup>;

$$CR_{ig} = D_{ig} \times SF_{ig}$$

where  $D_{ig}$  and  $SF_{ig}$  are as defined previously. In line with the Risk Assessment Guidance of USEPA<sup>1</sup>, the assessment models provide a qualitative description of the CR as follows; a value which is  $\leq 10^{-6}$  represents a very low cancer risk; values between  $10^{-6}$  and  $10^{-4}$  suggest low cancer risk; whereas values  $> 10^{-4}$  imply high cancer risk.<sup>3,10</sup>

Table S1

Values and distributions of parameters used in ILCR exposure assessment

| Parameters                                            | Units     | Values             |                    |                    |
|-------------------------------------------------------|-----------|--------------------|--------------------|--------------------|
|                                                       |           | Children           | Adolescents        | Adults             |
| IR (Rate of direct ingestion)                         | mg/d      | 0.016              | 0.032              | 0.032              |
| EF (Exposure frequency)                               | d/yr      | 365                | 365                | 365                |
| ED (Exposure duration)                                | Yr        | 6                  | 14                 | 70                 |
| BW (Body weight)                                      | kg        | 21                 | 51                 | 70                 |
| AT (average time for non-carcinogens and carcinogens) | D         | 2,190              | 5,110              | 25,550             |
| R <sub>f</sub> D                                      | mg/kg/day | 2×10 <sup>-5</sup> | 2×10 <sup>-5</sup> | 2×10 <sup>-5</sup> |
| SF                                                    | mg/kg/day | 2                  | 2                  | 2                  |

Source: USEPA<sup>4,5,10</sup>**Table S2:** Summary of the hazard quotient (HQ) estimation for Children (CHD), Adolescents (ADL), and Adults (ADT)

| Age Categories | Parameter | ASR    | ONR    | OGBR   | OGR    | IBR    | TMBO   |
|----------------|-----------|--------|--------|--------|--------|--------|--------|
| Children       | Min       | 0.003  | 0.003  | 0.003  | 0.003  | 0.003  | 0.003  |
|                | Max       | 0.334  | 0.797  | 0.305  | 0.648  | 0.791  | 1.095  |
|                | Mean      | 0.098  | 0.184  | 0.076  | 0.184  | 0.251  | 0.341  |
| Adolescents    | Min       | 0.0024 | 0.0023 | 0.0024 | 0.0024 | 0.0026 | 0.0024 |
|                | Max       | 0.2755 | 0.6562 | 0.2507 | 0.5329 | 0.6506 | 0.9008 |
|                | Mean      | 0.0805 | 0.1386 | 0.0627 | 0.1515 | 0.1873 | 0.2805 |
| Adults         | Min       | 0.0018 | 0.0017 | 0.0018 | 0.0017 | 0.0019 | 0.0018 |
|                | Max       | 0.2008 | 0.4782 | 0.1827 | 0.3884 | 0.4742 | 0.6566 |
|                | Mean      | 0.0587 | 0.1102 | 0.0457 | 0.1104 | 0.1507 | 0.2044 |

## References

1. USEPA, Risk Assessment Guidance for Superfund Volume I Human Health Evaluation Manual (Part A). EPA/540/189/002 Washington, D.C.: Oice of Emergency and Remedial Response U.S. Environmental Protection Agency; 1989, Available from [https://www.epa.gov/oswer/risk assessment/ragsa/pdf/rags-vol-pta\\_complete.pdf](https://www.epa.gov/oswer/risk%20assessment/ragsa/pdf/rags-vol-pta_complete.pdf).
2. I. A. Ololade, A. O. Apata, N. A. Oladoja, B. A. Alabi and O. O. Ololade, Polycyclic aromatic hydrocarbons in rivers and health risk consequences of human exposure: a Nigerian case study. *International Journal of Energy and Water Resources*, 2023a, <https://doi.org/10.1007/s42108-023-00236-1>.
3. I. A. Ololade, B. A. Alabi, N. A. Oladoja, O. O. Ololade and A. O. Apata, Occurrence and probabilistic risk assessment of polycyclic aromatic hydrocarbons in blood and urine of auto-mechanics in Akure Metro, Nigeria. *Environmental Monitoring and Assessment*, 2023b, **195**, 727.
4. USEPA, Risk Assessment Guidance for Superfund Volume I: Human Health Evaluation Manual (Part A), 2001a. Available online: [https://rais.ornl.gov/documents/HHEMA. pdf](https://rais.ornl.gov/documents/HHEMA.pdf) (accessed on March 31st, 2017).
5. USEPA, Risk Assessment Guidance for Superfund Volume I: Human Health Evaluation Manual (Part E), 2001b. Available online: <https://rais.ornl.gov/documents/HHEMA.pdf> (accessed on 31st March 2017).
6. C. Ding, H., Ni and H. Zheng, Parent and halogenated polycyclic aromatic hydrocarbons in rice and implications for human health in China. *Environmental Pollution*, 2012, **168**, 80-86
7. C. Chai, Q. Cheng, J. Wu, L. Zeng, Q. Chen, X. Zhu, D. Ma and W. Ge, Contamination, source identification, and risk assessment of polycyclic aromatic hydrocarbons in the soils of vegetable greenhouses in Shandong, China. *Ecotoxicology and Environmental Safety*, 2017, **142**,181–166.

8. I.A. Ololade, N.A. Oladoja, O.O. Ololade, T.D. Saliu, A.B. Alabi, S.B. Obadawo and M.M. Anifowose, Bioaccumulation and toxic potencies of polycyclic aromatic hydrocarbons in freshwater biota from Ogbese river, Nigeria. *Environmental Monitoring and Assessment*, 2021, **193**(1). <https://doi.org/10.1007/s10661-020-08759-4>.
9. A. Apata, I. A. Ololade, N. A. Oladoja, B. A. Alabi and O. O. Ololade, Seasonal congener survey for polychlorinated biphenyls in sediments of south-western rivers, Nigeria: Occurrence, sources, and ecotoxicological risks. *Regional Studies in Marine Science*, 2022a, **55**, 102623.
10. L. Singh and T. Agarwal, PAHs in Indian diet: Assessing the cancer risk. *Chemosphere*, 2018, **202**, 366–376.
11. USEPA. Exposure factors handbook: 2011 Edition. EPA/ 600/R-09/052F. National Center for Environmental Assessment, Office of Research and Development, U.S. Environmental Protection Agency, Washington, DC, 2011, [Cited September 14, 2012]; Available from: <http://www.epa.gov/ncea/efh/pdfs/efh-complete.pdf>.
